# Supplementary material for: Volume-dependent catalytic efficiency of highly durable Au@Ag–Pt core@multi-shell nanoparticles in methylene blue reduction
Source: Royal Society of Chemistry journal article supplement (doi:10.1039/d5ra06393k), 2025-01-01
Supplement: d5ra06393k1.pdf [file d5ra06393k1.pdf]

## SUPPORTING INFORMATION

### **Volume-dependent catalytic efficiency of highly durable Au@Ag-Pt core@multi-shell nanoparticles in methylene blue reduction**

Hu-Jun Lee<sup>1,2</sup>, Anh Thi Ngoc Dao<sup>3,\*</sup>, Kenji Kaneko<sup>1,\*</sup>

<sup>1</sup>Department of Materials, Kyushu University, 744, Motooka, Nishi, Fukuoka, 819-0395, Japan

<sup>2</sup>Institute of Advanced Composite Materials, Korea Institute of Science and Technology (KIST), Jeonbuk, 55324, Republic of Korea

<sup>3</sup>Graduate School of Integrated Science and Technology, Nagasaki University, 1-14 Bunkyo-machi, Nagasaki, Nagasaki, 852-8521, Japan

\* Corresponding authors: [kaneko.kenji.513@m.kyushu-u.ac.jp](mailto:kaneko.kenji.513@m.kyushu-u.ac.jp); [anh.dao@nagasaki-u.ac.jp](mailto:anh.dao@nagasaki-u.ac.jp)

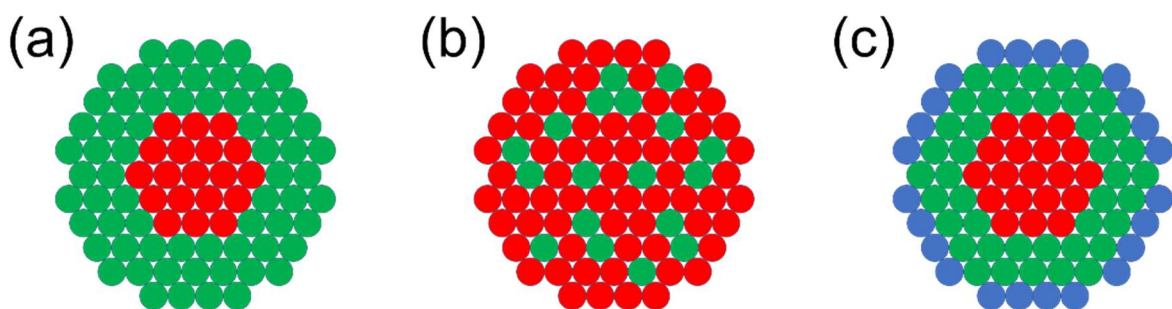

**Fig. S1.** Schematic diagram of (a) core-shell, (b) alloy, and (c) core@multi-shell structures, where each color represents a different element.

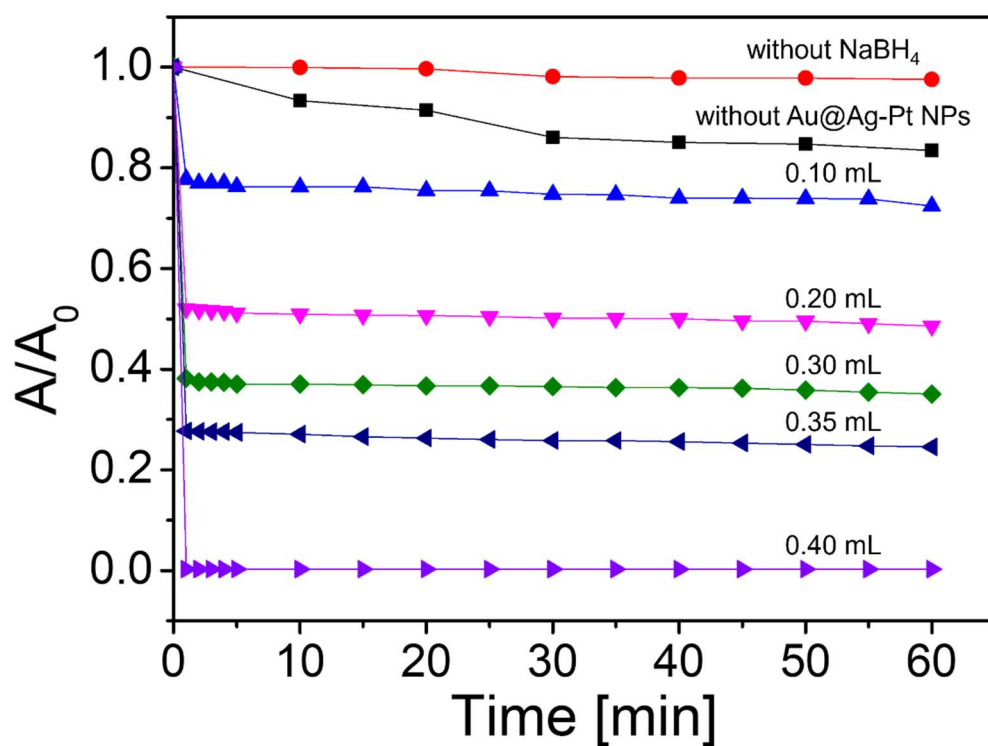

**Fig. S2.** Time-dependent absorbance variation of methylene blue (MB) during the reduction reaction, where  $A$  is the absorbance at 664 nm and  $A_0$  is the initial absorbance.
